# Supplementary material for: Digoxin detection for therapeutic drug monitoring using target-triggered aptamer hairpin switch and nicking enzyme-assisted signal amplification
Source: Royal Society of Chemistry journal article supplement (doi:10.1039/d4ay01540a), 2024-01-01
Supplement: d4ay01540a1.pdf [file d4ay01540a1.pdf]

## SUPPLEMENTARY INFORMATION

### **Digoxin detection for therapeutic drug monitoring using target-triggered aptamer hairpin switch and nicking enzyme-assisted signal amplification**

Yu-Ting Lin<sup>a</sup>, Jing-Ru Liou<sup>b</sup>, Hsin-Hua Liang<sup>a,c</sup>, Yi-Hui Lin<sup>c</sup>, Yen-Ling Chen<sup>a,d,e,f\*</sup>

<sup>a</sup>Department of Chemistry and Biochemistry, National Chung Cheng University, Chia-Yi 621301, Taiwan

<sup>b</sup>Department of Pharmacy, Kaohsiung Medical University Hospital, Kaohsiung 807378, Taiwan

<sup>c</sup>School of Pharmacy, China Medical University, Taichung 406040, Taiwan.

<sup>d</sup>Center for Nano Bio-Detection, National Chung Cheng University, Chia-Yi 621301, Taiwan

<sup>e</sup>School of Pharmacy, College of Pharmacy, Kaohsiung Medical University, Kaohsiung 807378, Taiwan

<sup>f</sup>Department of Fragrance and Cosmetic Science, College of Pharmacy, Kaohsiung Medical University, Kaohsiung 807378, Taiwan

\*Corresponding authors.

E-mail addresses: yelichen@ccu.edu.tw (Y.-L. Chen).

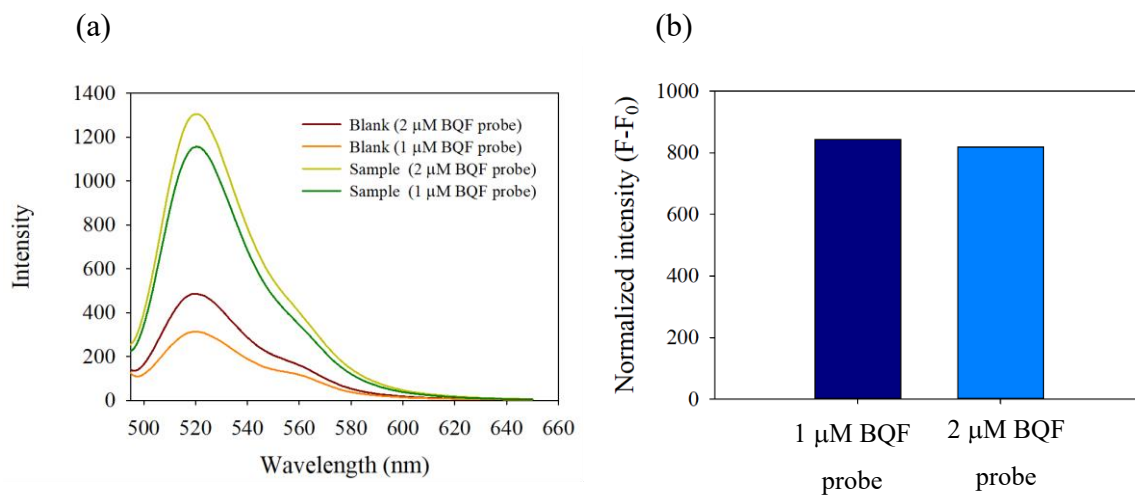

**Fig. S1** (a) Fluorescence spectra (b) Normalized intensities of different concentrations of BQF probe in the fluorescent aptasensor. Concentration of nicking enzyme: 5 U, Digoxin: 10 ng mL<sup>-1</sup>. Hairpin binding reaction were performed for 30 min at 25°C in 10 mM Tris buffer containing NaCl and MgCl<sub>2</sub> (pH 7.4), signal amplification reaction were performed at 37°C in 1×NEBuffer™ 2.
